# Supplementary material
Source: PubMed Central journal article supplement (PMC11329947)
Supplement: NIHMS2013553-supplement-Supplement___Chocolate_portion_sizes_.pdf [file NIHMS2013553-supplement-Supplement___Chocolate_portion_sizes_.pdf]

**Supplemental Figure 1.** Portion size and package amount of chocolate consumption. \*

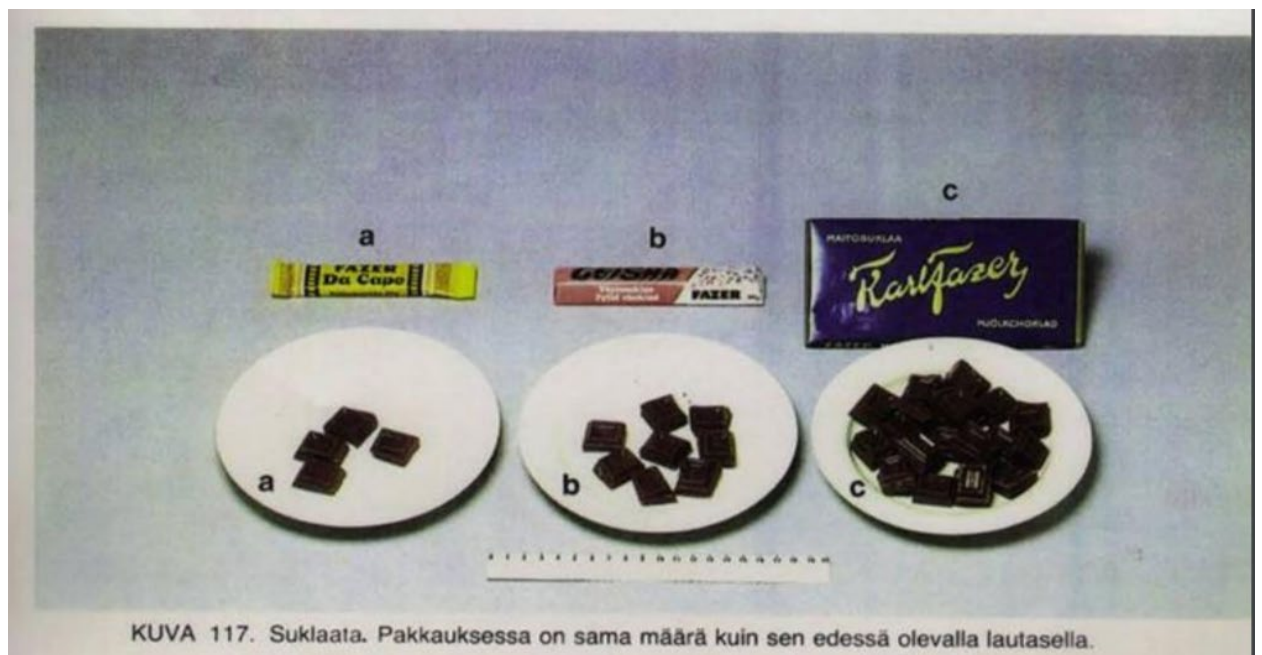

\* The package has the same amount as the plate in front of it. a) Da Capo chocolate; b) Geisha Fazer chocolate; c) Karl Fazer chocolate.

**Supplemental Figure 2.** Risk of CVD Mortality Associated with Daily Chocolate Consumption by Selected Factors in the ATBC Study <sup>a b</sup>

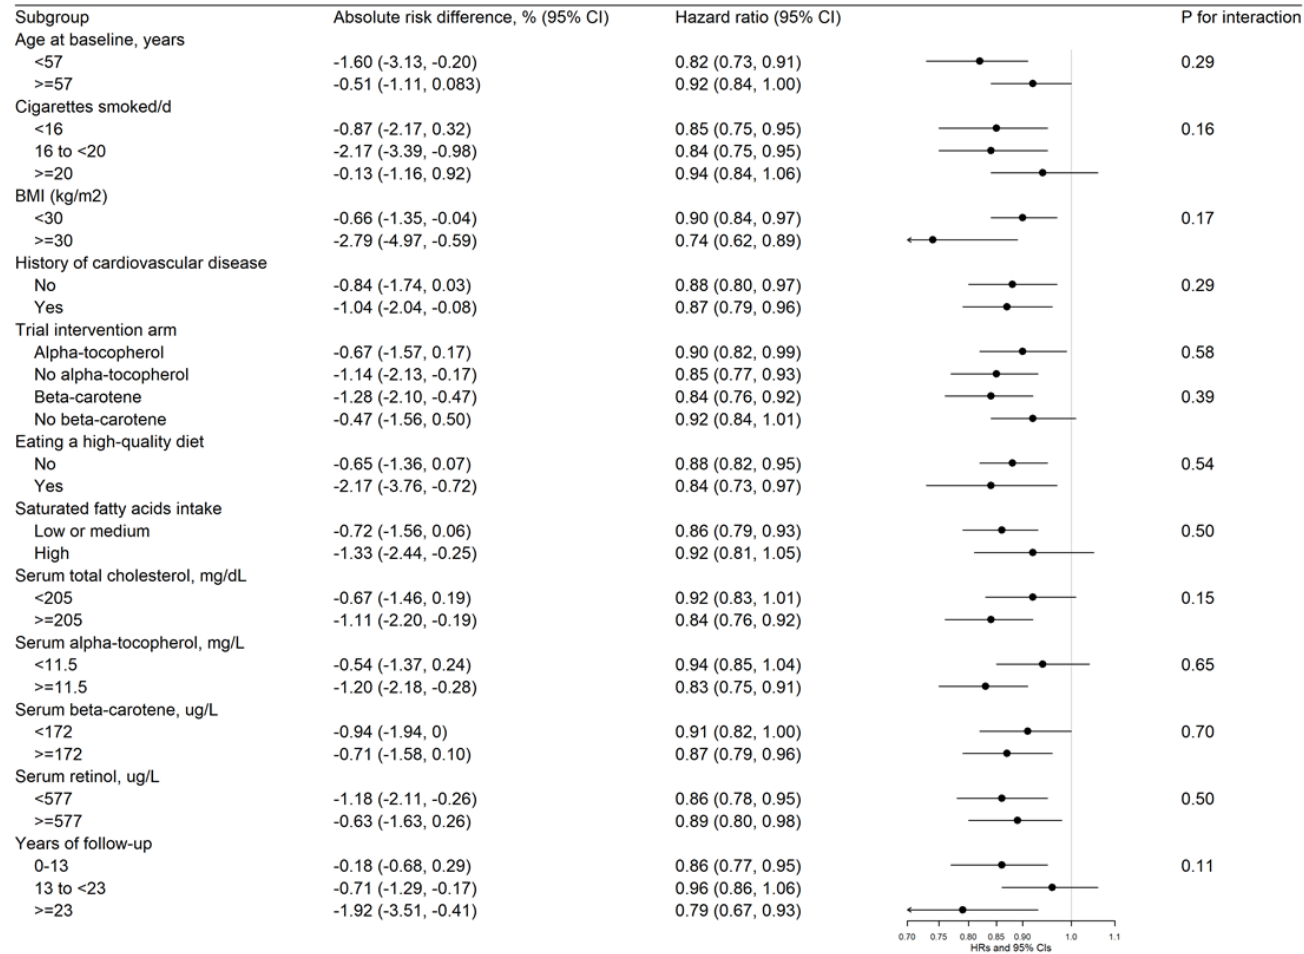

Abbreviations: ATBC = Alpha-Tocopherol, Beta-Carotene Cancer Prevention; CVD= cardiovascular disease; HDL = high-density lipoprotein, HR = hazard ratio

<sup>a</sup> Multivariable models were adjusted for age at entry, body mass index, cigarettes smoked per day, years of smoking, serum HDL cholesterol, intervention assignment, systolic and diastolic blood pressure, history of cardiovascular disease, diabetes, education, physical activity, and daily dietary total energy, alcohol, and Alternate Mediterranean Diet Score.

<sup>b</sup> Absolute risk differences and hazard ratios of CVD mortality are for the 5<sup>th</sup> category versus 1<sup>st</sup> category of chocolate consumption per day.

**Supplemental Figure 3.** Risk of Heart Disease Mortality Associated With Daily Chocolate Consumption by Selected Factors in the ATBC Study <sup>a, b</sup>

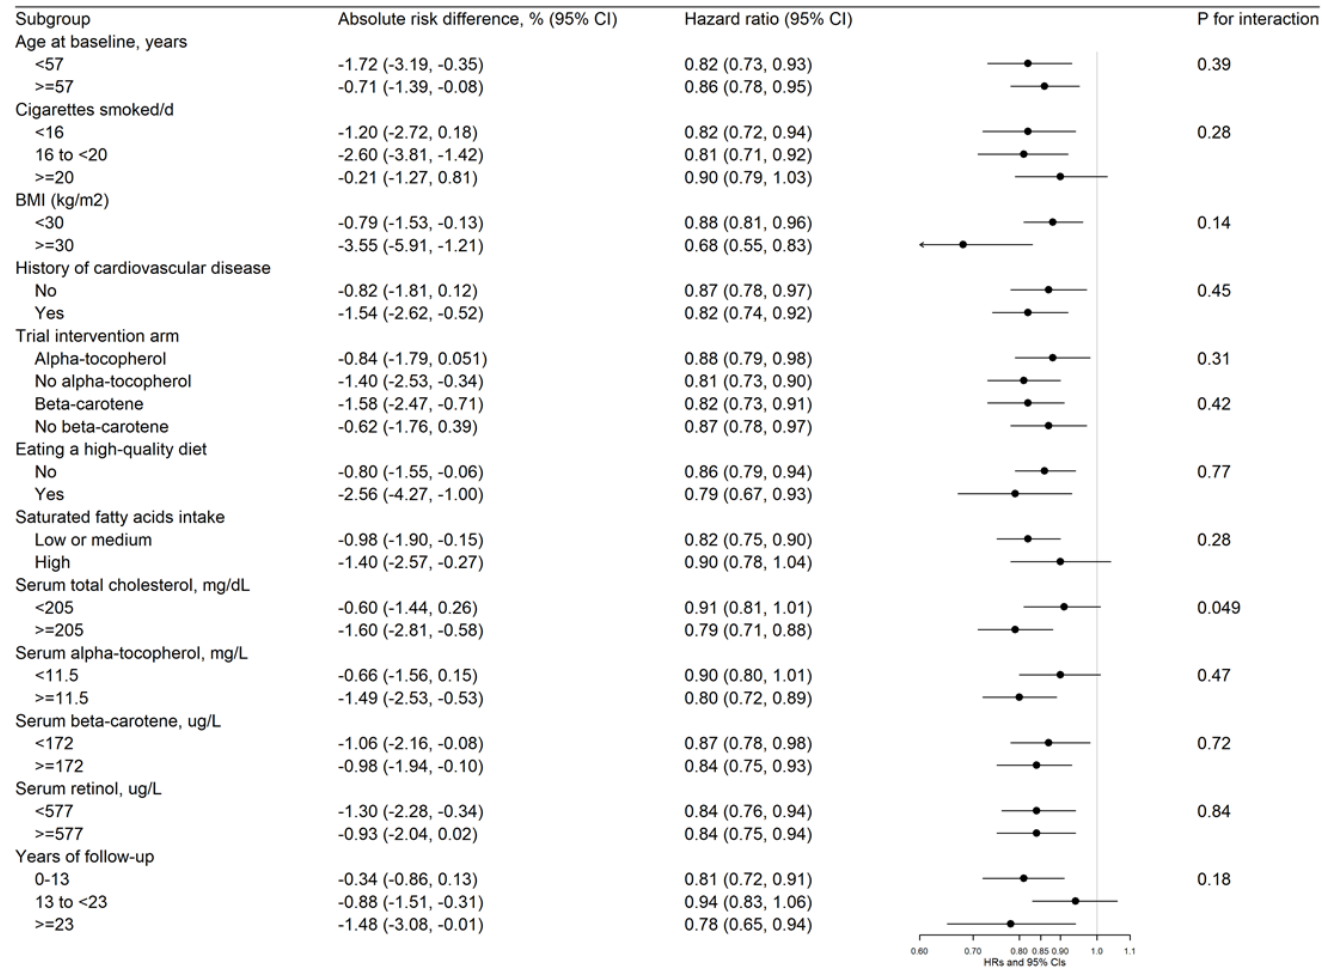

Abbreviations: ATBC = Alpha-Tocopherol, Beta-Carotene Cancer Prevention; HDL = high-density lipoprotein, HR = hazard ratio

<sup>a</sup> Multivariable models were adjusted for age at entry, body mass index, cigarettes smoked per day, years of smoking, serum HDL cholesterol, intervention assignment, systolic and diastolic blood pressure, history of cardiovascular disease, diabetes, education, physical activity, and daily dietary total energy, alcohol, and Alternate Mediterranean Diet Score.

<sup>b</sup> Absolute risk differences and hazard ratios of heart disease mortality are for the 5<sup>th</sup> category versus 1<sup>st</sup> category of chocolate consumption per day.

**Supplemental Figure 4.** Flow Chart of Systematic Review Meta-Analysis

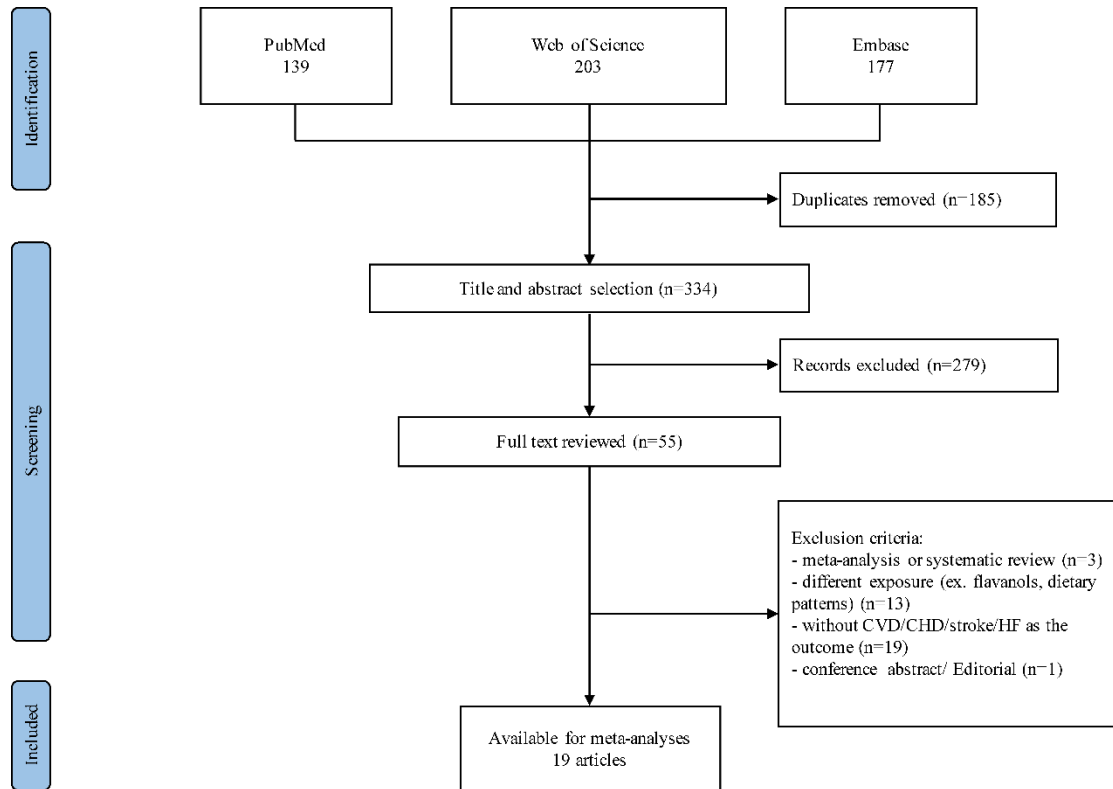

**Supplemental Figure 5.** Forest plot of influence analysis for the association between chocolate consumption and risk of cardiovascular disease incidence and mortality. Each dot represents the pooled RR (95% CIs) following omission of the study listed on the left using random-effects meta-analysis

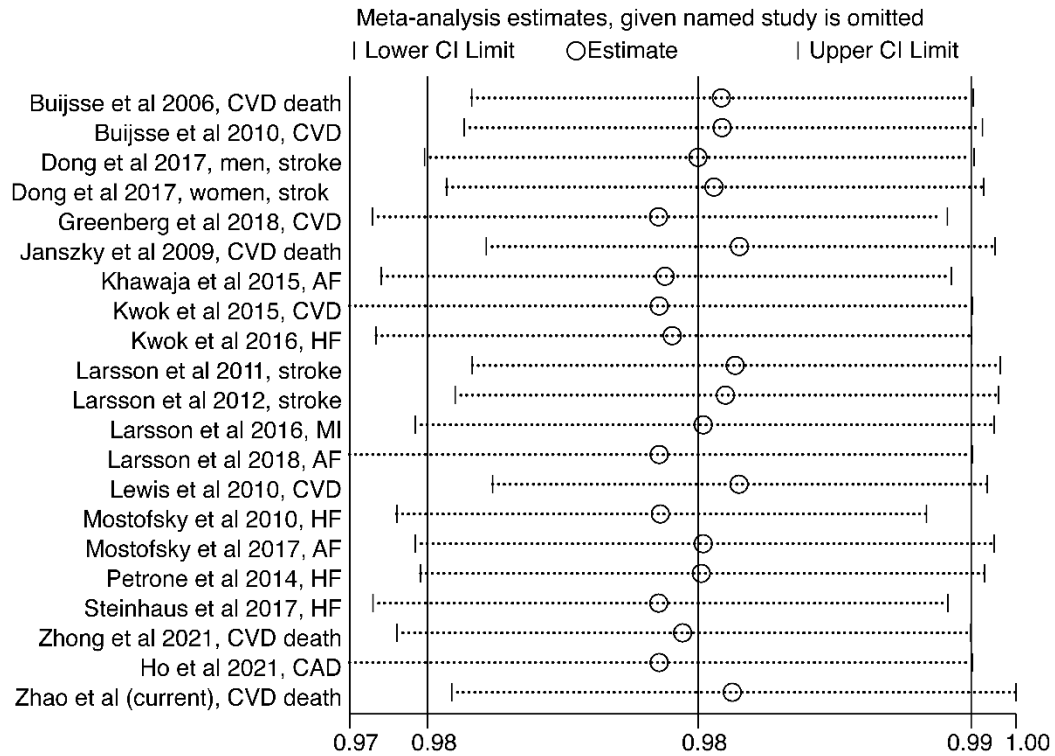

Abbreviations: AF = atrial fibrillation; CAD = coronary artery disease; CHD = coronary heart disease; CVD = cardiovascular disease; HF = heart failure; MI = myocardial infarction

**Supplemental Figure 6.** Funnel plot for assessment of publication bias for meta-analysis of the association between chocolate consumption and risk of cardiovascular disease incidence and mortality

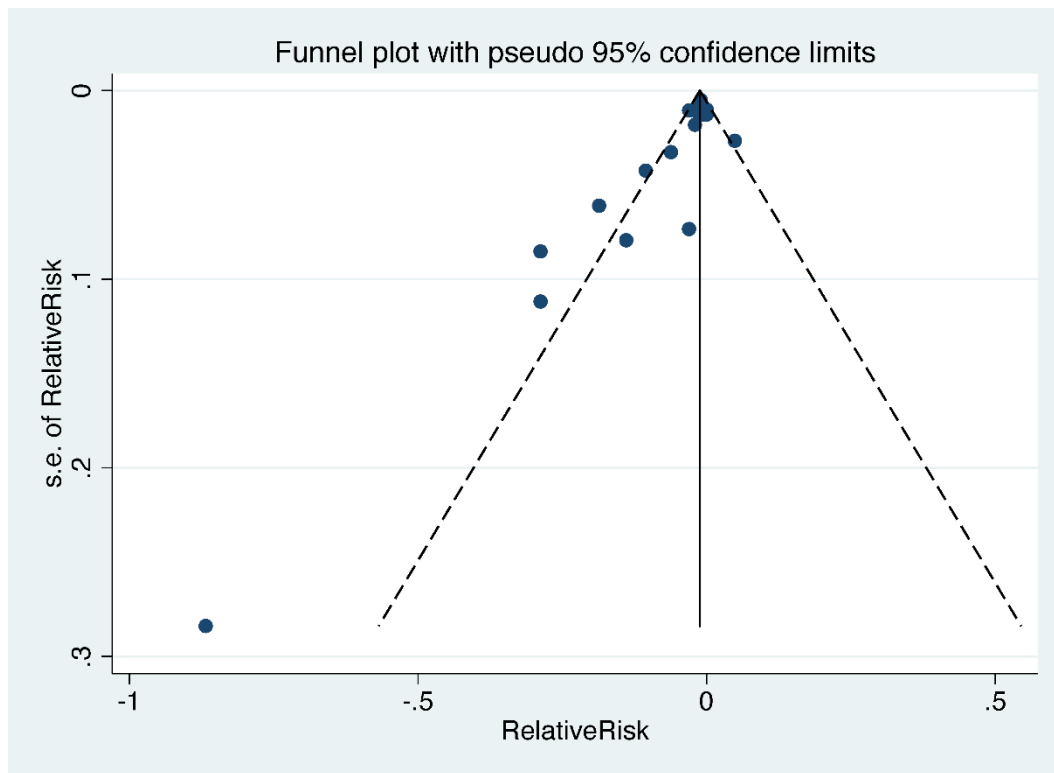

P value for Egger's test = 0.001



**Supplemental Figure 7.** Trim and Fill analysis of adjustment for publication bias in meta-analysis of the association between chocolate consumption and risk of cardiovascular disease incidence and mortality.

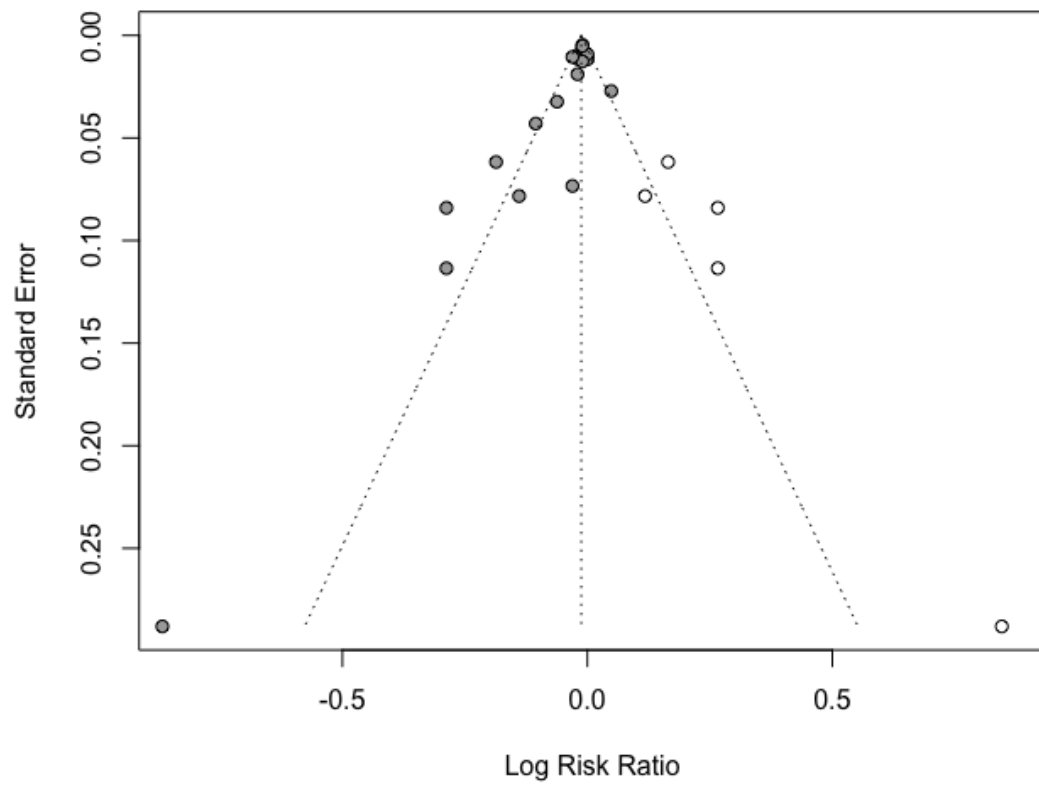

Observed 21 studies: pooled relative risk=0.98, 95% confidence interval: 0.975, 0.99; P value=0.0001  
Observed (21) + Filled (5) studies: pooled relative risk=0.988, 95% confidence interval: 0.976, 0.9995); P value =0.042
